# Supplementary material for: ML-MAGES enables multivariate genetic association analyses with genes and effect size shrinkage
Source: HighWire-hosted journal article supplement (doi:10.1101/gr.280440.125), 2025-11-19
Supplement: Supplemental_Tables.docx [file Supplemental_Tables.docx]

Table S1: **SNP-level performance of the 8 shrinkage methods (*ENET*, *SUSIE*, and 6 neural-network models among which two were shown in Figs 2 and 3) on SNP-only simulations.** Extended labeling of the methods distinguishes between neural network feature inputs; for example, the label *top5* denotes the NN model using the top *T* = 5 variants as features, and so forth. The average measures over 1600 simulations (100 simulations each for all 16 parameter settings) are reported, followed by their 95%-CI in brackets. Average precision is the area under the precision-recall curve (PCR). Best value for each measure is highlighted.

| Method | RMSE (*×*102) | Pearson Correlation | Average Precision |
| --- | --- | --- | --- |

| ENET | 0.513 [0.510, 0.516] | 0.320 [0.316, 0.324] | 0.217 [0.213, 0.221] |
| --- | --- | --- | --- |
| SUSIE | 0.335 [0.318, 0.351] | 0.355 [0.341, 0.369] | **0.364** [0.359, 0.369] |
| ML-MAGES (2L-top5) | 0.221 [0.220, 0.223] | 0.547 [0.542, 0.553] | 0.300 [0.295, 0.304] |
| ML-MAGES (2L-top10) | 0.220 [0.219, 0.221] | 0.556 [0.551, 0.561] | 0.307 [0.303, 0.312] |
| ML-MAGES (2L-top15) | 0.218 [0.216, 0.219] | **0.575** [0.570, 0.580] | 0.325 [0.321, 0.330] |
| ML-MAGES (3L-top5) | 0.218 [0.216, 0.220] | 0.561 [0.556, 0.566] | 0.308 [0.304, 0.313] |
| ML-MAGES (3L-top10) | **0.217** [0.215, 0.218] | 0.567 [0.562, 0.572] | 0.318 [0.313, 0.322] |
| ML-MAGES (3L-top15) | **0.217** [0.216, 0.219] | 0.569 [0.564, 0.574] | 0.320 [0.315, 0.324] |

Table S2: **SNP-level performances of the 8 shrinkage methods (same as in Supplemental Table** [**S1)**](#_bookmark0) **on gene-level simulations.** The average measures over 200 simulations (100 simulations, each with two traits) are reported, followed by their 95%-CI in brackets. Average precision is the area under the PRC shown in Fig. 2A. RMSE are shown in Fig. 2B. Best value for each measure is highlighted.

| Method | RMSE (*×*102) | Pearson Correlation | Average Precision |
| --- | --- | --- | --- |

| ENET | 0.296 [0.293, 0.298] | 0.266 [0.257, 0.276] | 0.120 [0.113, 0.126] |
| --- | --- | --- | --- |
| SUSIE | 1.510 [1.295, 1.726] | 0.176 [0.141, 0.211] | 0.180 [0.170, 0.190] |
| ML-MAGES (2L-top5) | 0.142 [0.139, 0.144] | 0.404 [0.395, 0.412] | 0.220 [0.211, 0.228] |
| ML-MAGES (2L-top10) | 0.142 [0.140, 0.145] | **0.412** [0.403, 0.420] | 0.223 [0.214, 0.232] |
| ML-MAGES (2L-top15) | 0.148 [0.145, 0.151] | **0.412** [0.403, 0.420] | **0.225** [0.216, 0.233] |
| ML-MAGES (3L-top5) | **0.131** [0.129, 0.134] | 0.407 [0.398, 0.416] | 0.221 [0.212, 0.230] |
| ML-MAGES (3L-top10) | 0.139 [0.136, 0.141] | 0.402 [0.394, 0.411] | 0.222 [0.214, 0.231] |
| ML-MAGES (3L-top15) | 0.141 [0.138, 0.144] | 0.400 [0.391, 0.408] | 0.217 [0.208, 0.225] |

Table S3: **Performance of univariate gene enrichment analysis of the 8 shrinkage methods (same as in Supplemental Table** [**S1)**](#_bookmark0) **on gene-level simulations.** The average measures over 200 simulations (100 simulations, each with two traits) are reported, followed by their 95%-CI in brackets. *F* -scores are shown in Fig. 2D. Best value for each measure is highlighted.

|  | Precision | Recall | *F* -score |
| --- | --- | --- | --- |

| ENET | **0.807** [0.759, 0.856] | 0.160 [0.145, 0.175] | 0.257 [0.235, 0.279] |
| --- | --- | --- | --- |
| SUSIE | 0.730 [0.695, 0.765] | 0.293 [0.266, 0.319] | 0.389 [0.361, 0.417] |
| ML-MAGES (2L-top5) | 0.671 [0.640, 0.702] | **0.390** [0.368, 0.411] | 0.452 [0.434, 0.470] |
| ML-MAGES (2L-top10) | 0.723 [0.695, 0.752] | 0.375 [0.355, 0.396] | 0.458 [0.440, 0.476] |
| ML-MAGES (2L-top15) | 0.705 [0.675, 0.735] | 0.386 [0.365, 0.406] | **0.465** [0.446, 0.483] |
| ML-MAGES (3L-top5) | 0.680 [0.649, 0.711] | 0.381 [0.360, 0.402] | 0.454 [0.437, 0.471] |
| ML-MAGES (3L-top10) | 0.714 [0.685, 0.744] | 0.375 [0.354, 0.396] | 0.455 [0.437, 0.472] |
| ML-MAGES (3L-top15) | 0.745 [0.716, 0.773] | 0.359 [0.339, 0.379] | 0.456 [0.438, 0.473] |

Table S4: **Performances of gene-level bivariate analysis—trait-specific versus shared-association categorization—of the 8 shrinkage methods (same as in Supplemental Table** [**S1)**](#_bookmark0) **on gene-level sim- ulations.** The average values of average precision (AP) are measured over 100 simulations, followed by their 95%CI in brackets. AP quantifies how well the sum of absolute effects from corresponding clusters can rank the truly causal variants of each association type at the top of a sorted list, which effectively sum- marizes the precision-recall curve. Measures are those shown in Fig. 2E-G. Best value for each measure is highlighted.

|  | Trait-1-specific AP | Trait-2-specific AP | Shared-association AP |
| --- | --- | --- | --- |

| ENET | 0.260 [0.220, 0.301] | 0.224 [0.187, 0.261] | 0.275 [0.233, 0.318] |
| --- | --- | --- | --- |
| SUSIE | 0.193 [0.168, 0.219] | 0.165 [0.143, 0.187] | 0.253 [0.223, 0.282] |
| ML-MAGES (2L-top5) | **0.524** [0.490, 0.558] | 0.485 [0.451, 0.520] | 0.581 [0.549, 0.613] |
| ML-MAGES (2L-top10) | 0.429 [0.395, 0.462] | 0.381 [0.351, 0.412] | 0.496 [0.462, 0.529] |
| ML-MAGES (2L-top15) | 0.520 [0.483, 0.558] | 0.465 [0.426, 0.505] | **0.590** [0.555, 0.625] |
| ML-MAGES (3L-top5) | 0.463 [0.428, 0.499] | 0.427 [0.393, 0.461] | 0.529 [0.496, 0.562] |
| ML-MAGES (3L-top10) | 0.515 [0.480, 0.549] | **0.486** [0.452, 0.520] | 0.585 [0.554, 0.617] |
| ML-MAGES (3L-top15) | 0.409 [0.369, 0.450] | 0.360 [0.323, 0.397] | 0.472 [0.432, 0.511] |

Table S5: **Shrinkage time (in seconds) of the 8 shrinkage methods (same as in Supplemental Table** [**S1)**](#_bookmark0) **for each simulation in the gene-level simulation data.** Results are calculated across 100 simulations generated on 1,000-variant segments from Chromosome 22, or 200 simulations generated on Chromosome 15 (15,250 SNPs) splitted into 17 LD blocks. *SuSiE-RSS* is run in R, while the rest are run in Python. Implementation details can be found in Supplemental Methods S1.14.

Simulation Data

Segments with 1,000 variants

15,250 variants split into 17 segments

| Method | Median | Mean | Std.Dev. | Median | Mean | Std.Dev. |
| --- | --- | --- | --- | --- | --- | --- |

| ENET | 4.58 | 4.62 | 1.25 | 86.17 | 88.13 | 20.39 |
| --- | --- | --- | --- | --- | --- | --- |
| SUSIE | 1.82 | 1.75 | 1.50 | 181.95 | 210.16 | 106.28 |
| ML-MAGES (2L-top5) | 0.06 | 0.06 | 0.01 | 1.89 | 1.99 | 0.37 |
| ML-MAGES (2L-top10) | 0.07 | 0.07 | 0.01 | 2.05 | 2.33 | 0.98 |
| ML-MAGES (2L-top15) | 0.09 | 0.09 | 0.03 | 2.29 | 2.91 | 2.23 |
| ML-MAGES (3L-top5) | 0.06 | 0.06 | 0.01 | 1.92 | 2.03 | 0.42 |
| ML-MAGES (3L-top10) | 0.07 | 0.07 | 0.01 | 2.09 | 2.38 | 1.04 |
| ML-MAGES (3L-top15) | 0.09 | 0.09 | 0.02 | 2.27 | 2.85 | 2.24 |

Table S6: **Training time (in seconds) per epoch for each of the 6 NN models, plus the “LINEAR” model.** Mean and standard deviation of the time spent per epoch, the average number of epochs during the training of each model, and the average training time per model (averaged across 10 models) are shown.

| Method | Average time  per epoch | Std.dev. of time  per epoch | Average number  of epochs | Average training  time per model |
| --- | --- | --- | --- | --- |

| LINEAR | 4.17 | 0.13 | 25.80 | 107.71 |
| --- | --- | --- | --- | --- |
| ML-MAGES (2L-top5) | 9.34 | 0.26 | 70.50 | 658.28 |
| ML-MAGES (2L-top10) | 11.32 | 2.95 | 70.70 | 800.45 |
| ML-MAGES (2L-top15) | 9.53 | 0.19 | 97.80 | 931.59 |
| ML-MAGES (3L-top5) | 11.98 | 0.25 | 78.20 | 936.46 |
| ML-MAGES (3L-top10) | 12.53 | 0.96 | 83.40 | 1044.59 |
| ML-MAGES (3L-top15) | 12.15 | 0.44 | 78.10 | 948.59 |
